# Supplementary material for: Tenascin C+ papillary fibroblasts facilitate neuro-immune interaction in a mouse model of psoriasis
Source: PubMed Central journal article supplement (PMC10086024; doi:10.1038/s41467-023-37798-x), 2023-04-10
Supplement: 41467_2023_37798_MOESM1_ESM.pdf [file 41467_2023_37798_MOESM1_ESM.pdf]

1 *Supplementary information*

2 **Tenascin C<sup>+</sup> Papillary Fibroblasts Facilitate Neuro-immune Interaction in a**  
3 **Mouse Model of Psoriasis**

4 Xiaojie CAI<sup>1,\*</sup>, Maoying HAN<sup>2,\*</sup>, Fangzhou LOU<sup>1</sup>, Yang SUN<sup>1</sup>, Qianqian YIN<sup>3</sup>, Libo  
5 SUN<sup>1</sup>, Zhikai WANG<sup>3</sup>, Xiangxiao LI<sup>1</sup>, Hong ZHOU<sup>1</sup>, Zhenyao XU<sup>1</sup>, Hong WANG<sup>3</sup>,  
6 Siyu DENG<sup>1</sup>, Xichen ZHENG<sup>1</sup>, Taiyu ZHANG<sup>1</sup>, Qun LI<sup>4</sup>, Bin ZHOU<sup>2,#</sup>, and Honglin  
7 WANG<sup>1,5,#</sup>

8 <sup>1</sup>Precision Research Center for Refractory Diseases, Shanghai General Hospital,  
9 Shanghai Jiao Tong University School of Medicine, Shanghai 201620, China

10 <sup>2</sup>State Key Laboratory of Cell Biology, CAS Center for Excellence in Molecular Cell  
11 Science, Shanghai Institute of Biochemistry and Cell Biology, Chinese Academy of  
12 Sciences, University of Chinese Academy of Sciences, Shanghai 200031, China

13 <sup>3</sup>Shanghai Institute of Immunology, Shanghai Jiao Tong University School of Medicine,  
14 Shanghai 200025, China

15 <sup>4</sup>The Department of Cardiovascular Medicine, State Key Laboratory of Medical  
16 Genomics, Ruijin Hospital, Shanghai Institute of Hypertension, Shanghai Jiao Tong  
17 University School of Medicine, Shanghai 200025, China

18 <sup>5</sup>Lead Contact

19 \*These authors contributed equally.

20 #These authors jointly supervised this work:

21

22 **Honglin WANG**, Ph.D.

23 Precision Research Center for Refractory Diseases, Shanghai General Hospital,  
24 Shanghai Jiao Tong University School of Medicine, Shanghai 201620, China

25 **E-mail:** [honglin.wang@sjtu.edu.cn](mailto:honglin.wang@sjtu.edu.cn)

26

27 **Bin ZHOU**, Ph.D.

28 State Key Laboratory of Cell Biology, CAS Center for Excellence in Molecular Cell  
29 Science, Shanghai Institute of Biochemistry and Cell Biology, Chinese Academy of  
30 Sciences, University of Chinese Academy of Sciences, Shanghai 200031, China

31 **E-mail:** [zhoubin@sibs.ac.cn](mailto:zhoubin@sibs.ac.cn)

32

# Supplementary Figure 1

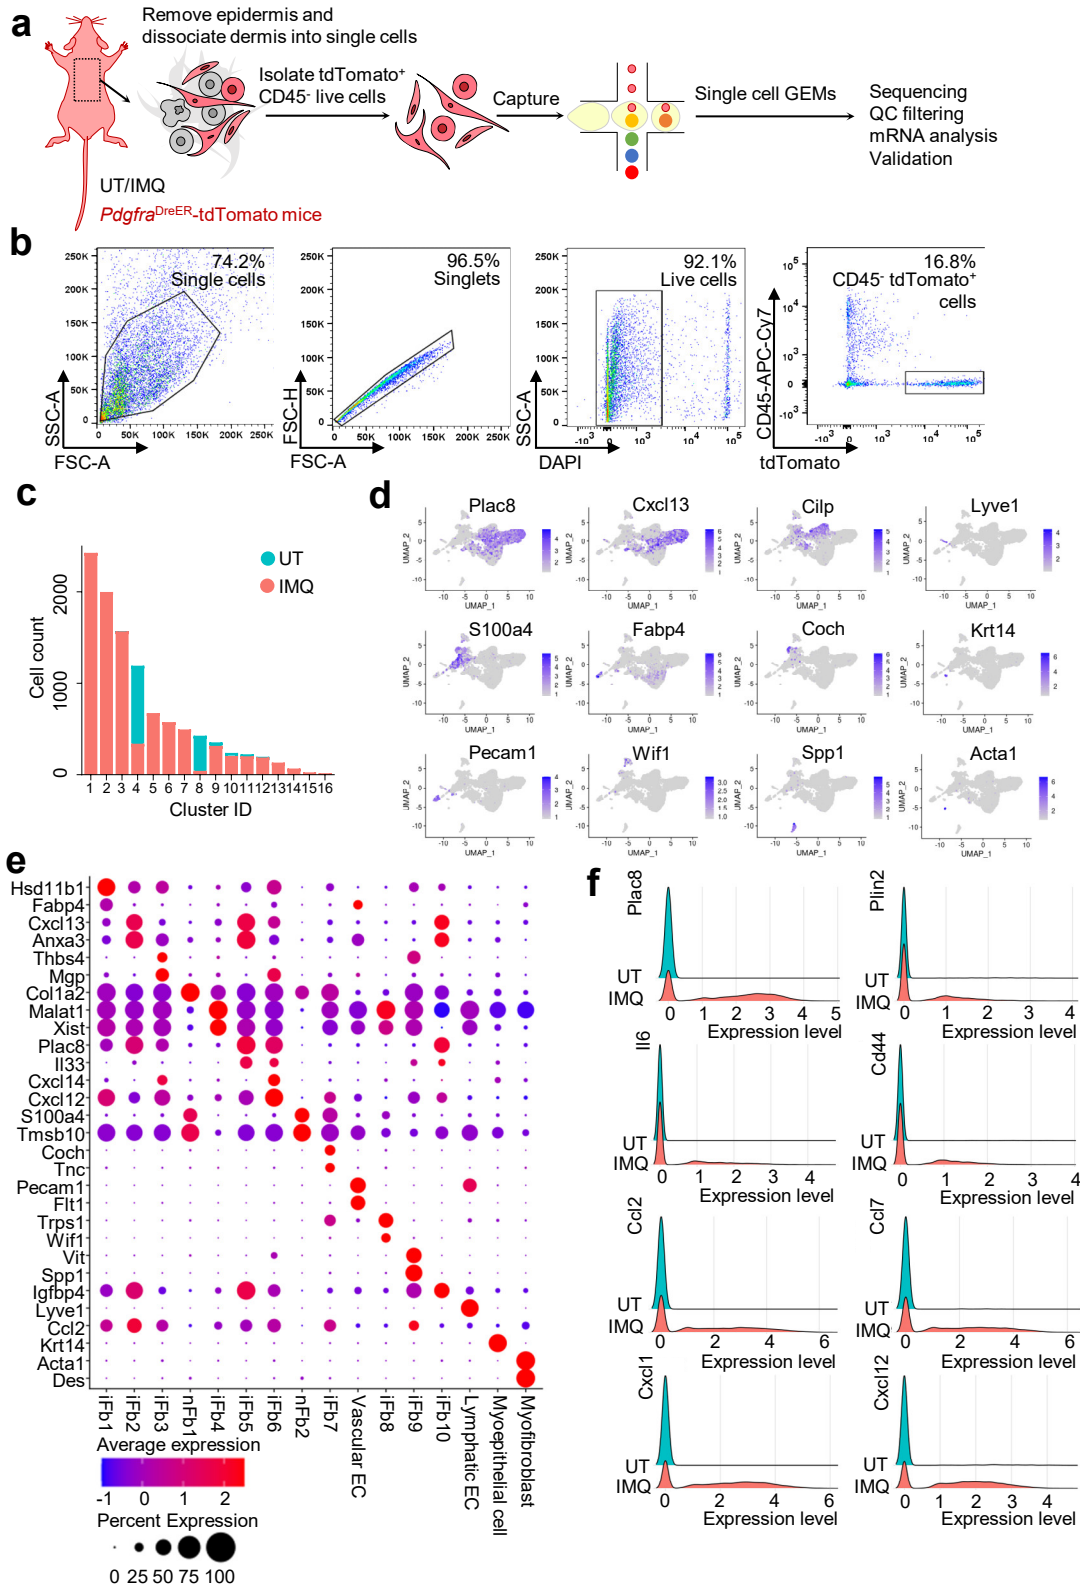

36 **Supplementary Fig. 1: ScRNA-seq shows lineage skews and pro-inflammatory**  
37 **traits of dermal fibroblasts upon IMQ challenge.**

38 **a**, ScRNA-seq workflow of *Pdgfra*-lineage cells from untreated (UT) and imiquimod  
39 (IMQ)-induced skin of *Pdgfra*<sup>DreER</sup>-tdTomato mice (n = 1 per group).

40 **b**, Fluorescence-activated cell sorting gating strategy for CD45<sup>-</sup>tdTomato<sup>+</sup> lineage cells  
41 in **(a)**.

42 **c**, Quantification of cell source among clusters (Of the total, 1340 UT cells and 9312  
43 IMQ cells were included in statistics).

44 **d, e**, Feature plot (**d**) and dot plot (**e**) of signature genes among clusters.

45 **f**, Ridge plot of pro-adipogenic, pro-inflammatory and chemotactic gene expression  
46 level in cells from UT or IMQ dataset. Source data are provided as a Source Data file.

47

48 **Supplementary Figure 2**

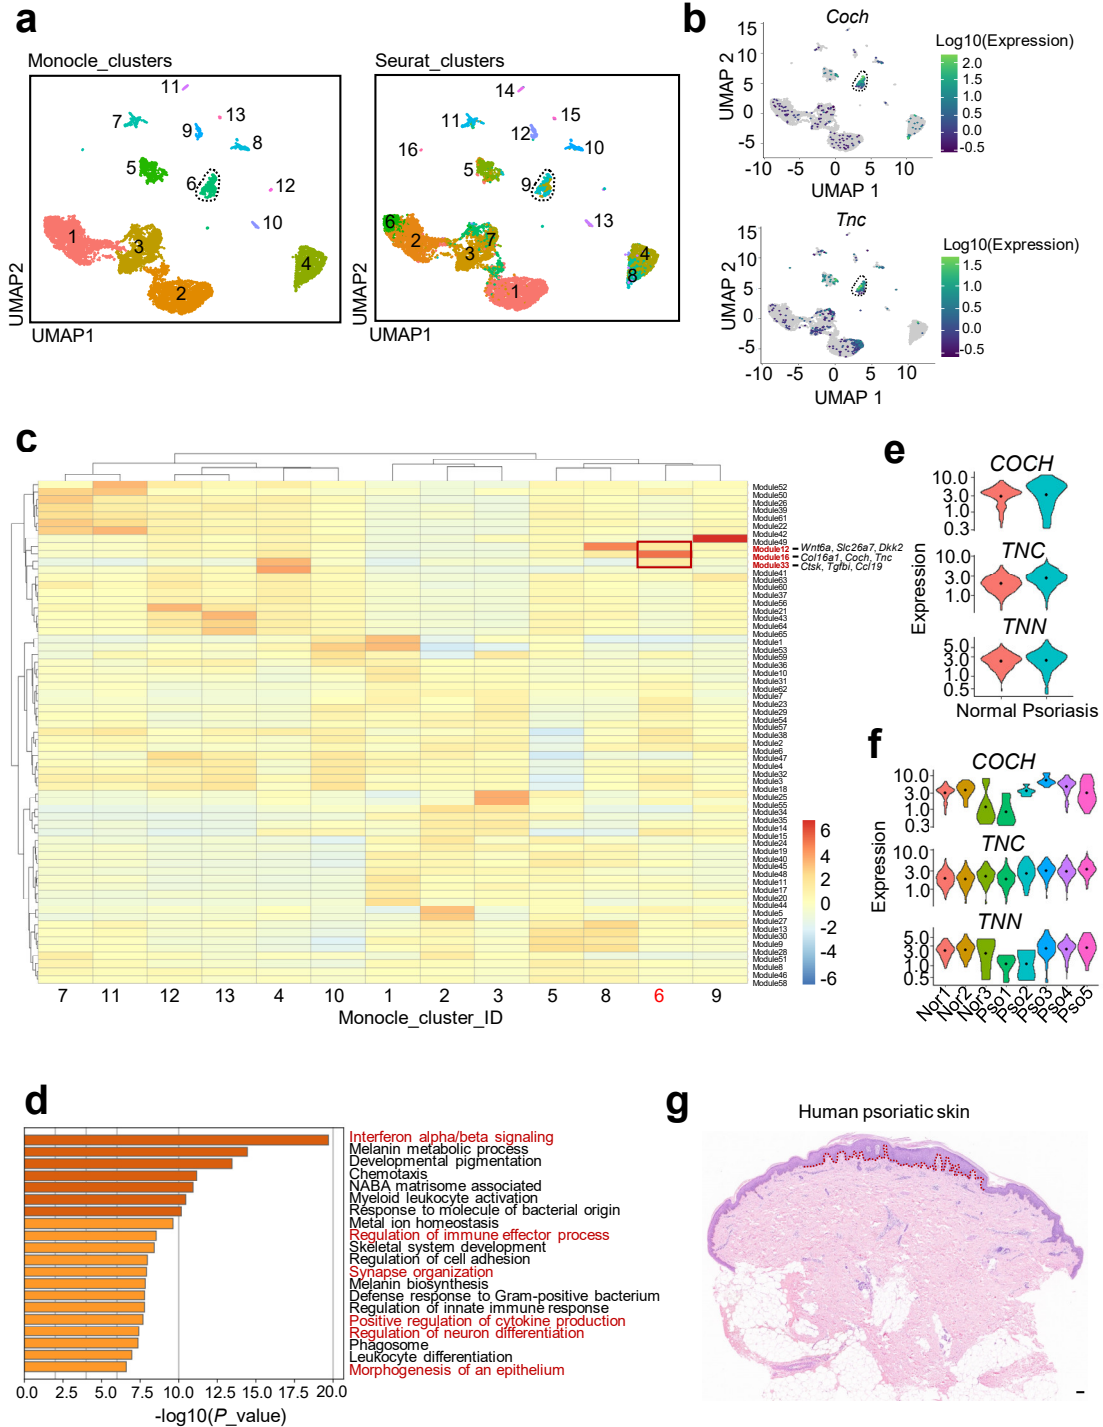

51 **Supplementary Fig. 2: *Coch* (*COCH*)<sup>+</sup>*Tnc* (*TNC*)<sup>+</sup> fibroblasts show neuron-**  
52 **regulatory and inflammation-responsive gene signatures in psoriatic skin.**

53 **a**, Comparison of unbiased clustering of *Pdgfra*-lineage cells between Monocle and  
54 Seurat. *Coch*<sup>+</sup>*Tnc*<sup>+</sup> fibroblast cluster is indicated by the dotted line.

55 **b**, Feature plots of *Coch* and *Tnc* by Monocle. *Coch*<sup>+</sup>*Tnc*<sup>+</sup> fibroblast cluster is indicated  
56 by the dotted line.

57 **c**, Enriched gene module heatmap grouped by monocle clusters. The most enriched  
58 gene modules of *Coch*<sup>+</sup>*Tnc*<sup>+</sup> fibroblasts are indicated by the red rectangle.

59 **d-f**, ScRNA-seq analysis of normal human skin versus psoriatic lesion. Top-ranked GO  
60 pathways of the enriched genes in *COCH*<sup>+</sup>*TNC*<sup>+</sup>*TNN*<sup>+</sup> dermal fibroblasts by Metascape  
61 (version 3.5, **d**). Violin plots of *COCH*, *TNC*, and *TNN* expression in normal (n = 3) or  
62 psoriatic skin (n = 5) fibroblasts in general (**e**) and individuals (**f**).

63 **g**, Representative H&E image of a human psoriatic skin biopsy (n = 5). The lesional  
64 area is indicated by the red dot line. Scale bar, 100 μm. Source data are provided as a  
65 Source Data file.

66

67 **Supplementary Figure 3**

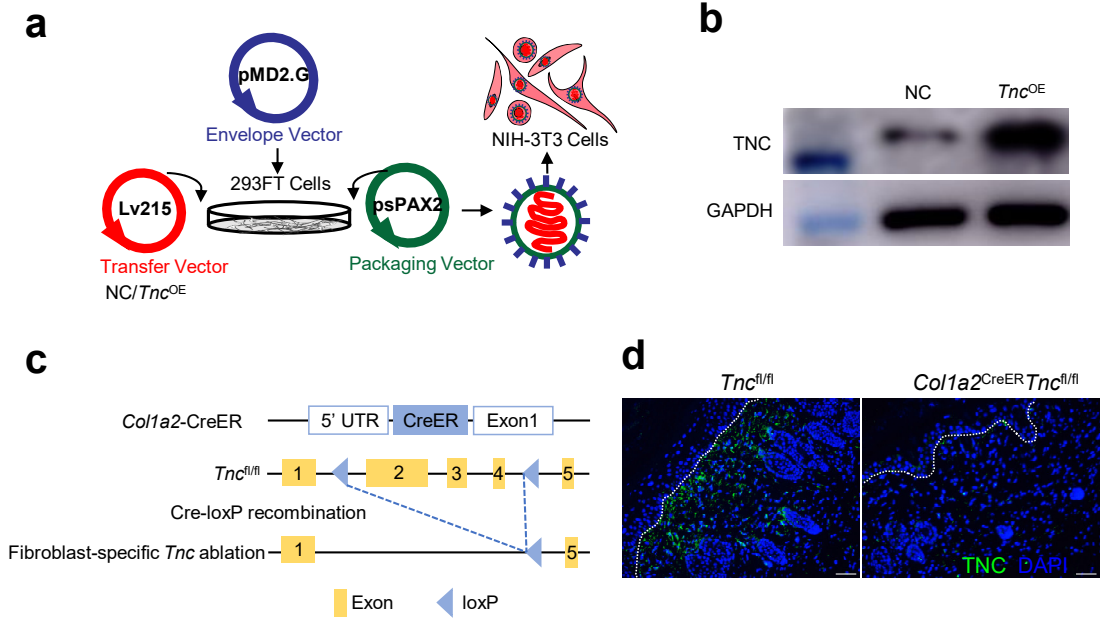

70 **Supplementary Fig. 3: Construction strategies for the NC/*Tnc*<sup>OE</sup> NIH-3T3 cell**

71 **lines and *Colla2*<sup>CreER</sup>*Tnc*<sup>fl/fl</sup> mouse strain.**

72 **a**, Construction strategy of NC/*Tnc*<sup>OE</sup> NIH-3T3 cells by Lv215 lentivirus infection. NC,  
73 negative control. *Tnc*<sup>OE</sup>, Tnc-overexpressing.

74 **b**, Immunoblot of TNC expression in NC and *Tnc*<sup>OE</sup> NIH-3T3 cells.

75 **c**, Fibroblast-specific *Tnc* ablation strategy of *Colla2*<sup>CreER</sup>*Tnc*<sup>fl/fl</sup> mice.

76 **d**, Representative immunofluorescent images of TNC expression in the skin of IMQ-  
77 induced *Tnc*<sup>fl/fl</sup> or *Colla2*<sup>CreER</sup>*Tnc*<sup>fl/fl</sup> mice (n = 3 mouse skin samples per group). Scale  
78 bar, 100 μm.

79 Data are representatives of two independent experiments.

80

81 **Supplementary Figure 4**

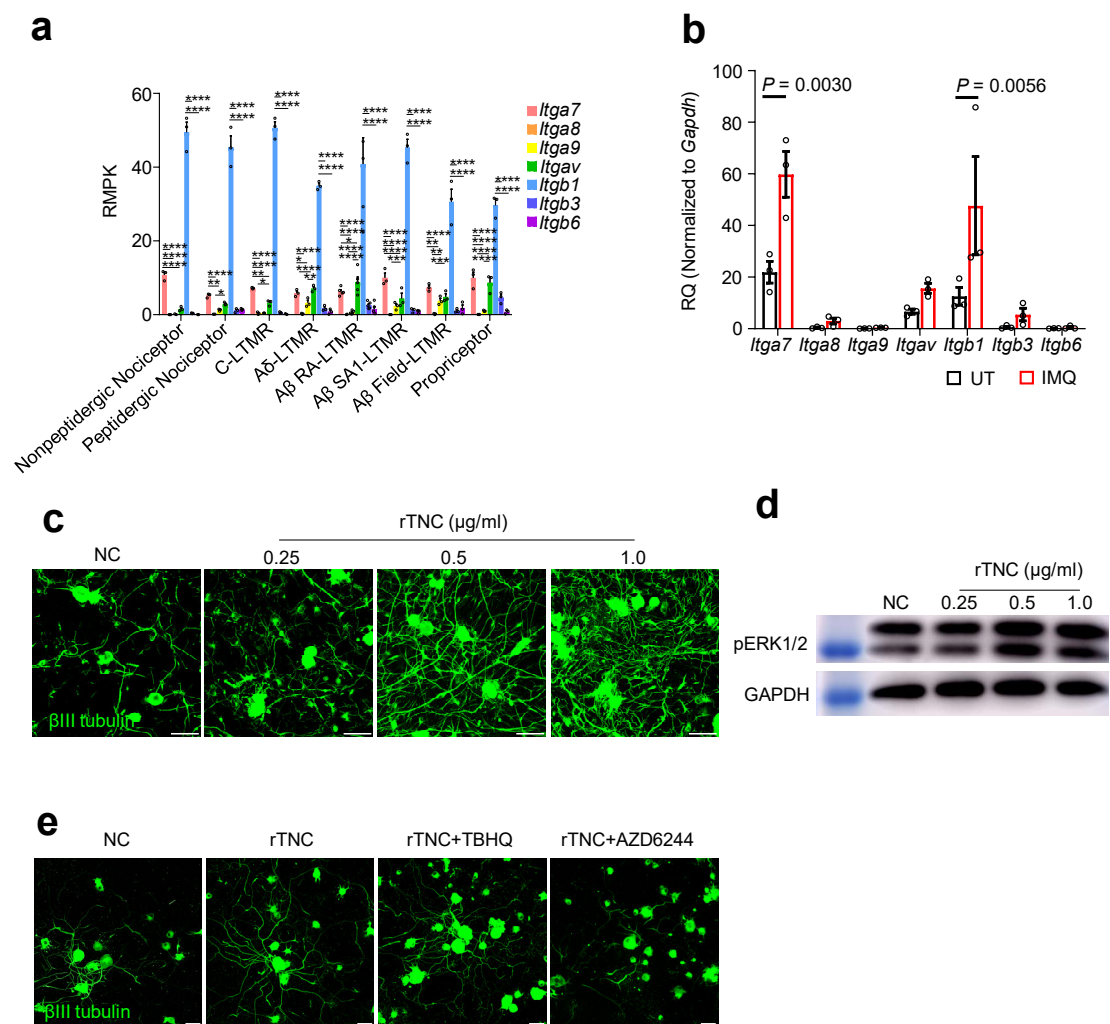

82

83



84 **Supplementary Fig. 4: TNC promotes axonogenesis in an ERK signaling-**  
85 **dependent manner.**

86 **a**, Quantification of integrin subunit expression on different dorsal root ganglion (DRG)  
87 neuron subtypes (n = 5 samples for A $\beta$  RA-LTMR group, and n = 3 samples for other  
88 groups). Peptidergic Nociceptor, \**P* = 0.0437, \*\**P* = 0.0022; C-LTMR, \**P* = 0.0424,  
89 \*\**P* = 0.0019; A $\delta$ -LTMR, \**P* = 0.0285, \*\**P* = 0.0027; A $\beta$  RA-LTMR, \**P* = 0.0149; A $\beta$   
90 SA1-LTMR, \*\*\**P* = 0.0006; A $\beta$  Field-LTMR, \*\**P* = 0.0054 (*Itga7* vs. *Itga9*), \*\**P* =  
91 0.0060 (*Itga8* vs. *Itga9*), \*\*\**P* = 0.0002; For all groups, \*\*\*\**P* < 0.0001.

92 **b**, qPCR analysis of integrin subunit expression of isolated DRG neurons from  
93 Untreated (UT) or Imiquimod-induced (IMQ) mice (n = 3 mice per group).

94 **c**, Representative immunofluorescent images of neurite outgrowth of DRG neurons  
95 treated with different doses of recombinant TNC (n = 3 cultures per group). Scale bar,  
96 50  $\mu$ m.

97 **d**, Immunoblot of ERK1/2 phosphorylation of DRG neurons treated with different  
98 doses of recombinant TNC.

99 **e**, Representative immunofluorescent images of neurite outgrowth of DRG neurons  
100 treated with recombinant TNC (0.5  $\mu$ g/mL), ERK agonist butylhydroquinone (TBHQ,  
101 1  $\mu$ M) and ERK inhibitor AZD6244 (1  $\mu$ M, n = 3 cultures per group). Scale bar, 50  $\mu$ m.

102 Data are representatives of two independent experiments and presented as the mean  $\pm$   
103 SEM. The *P* values were calculated by two-way ANOVA and Holm-Šídák test (**a**) or  
104 two-tailed unpaired Student's *t*-test (**b**). Source data are provided as a Source Data file.

105

# Supplementary Figure 5

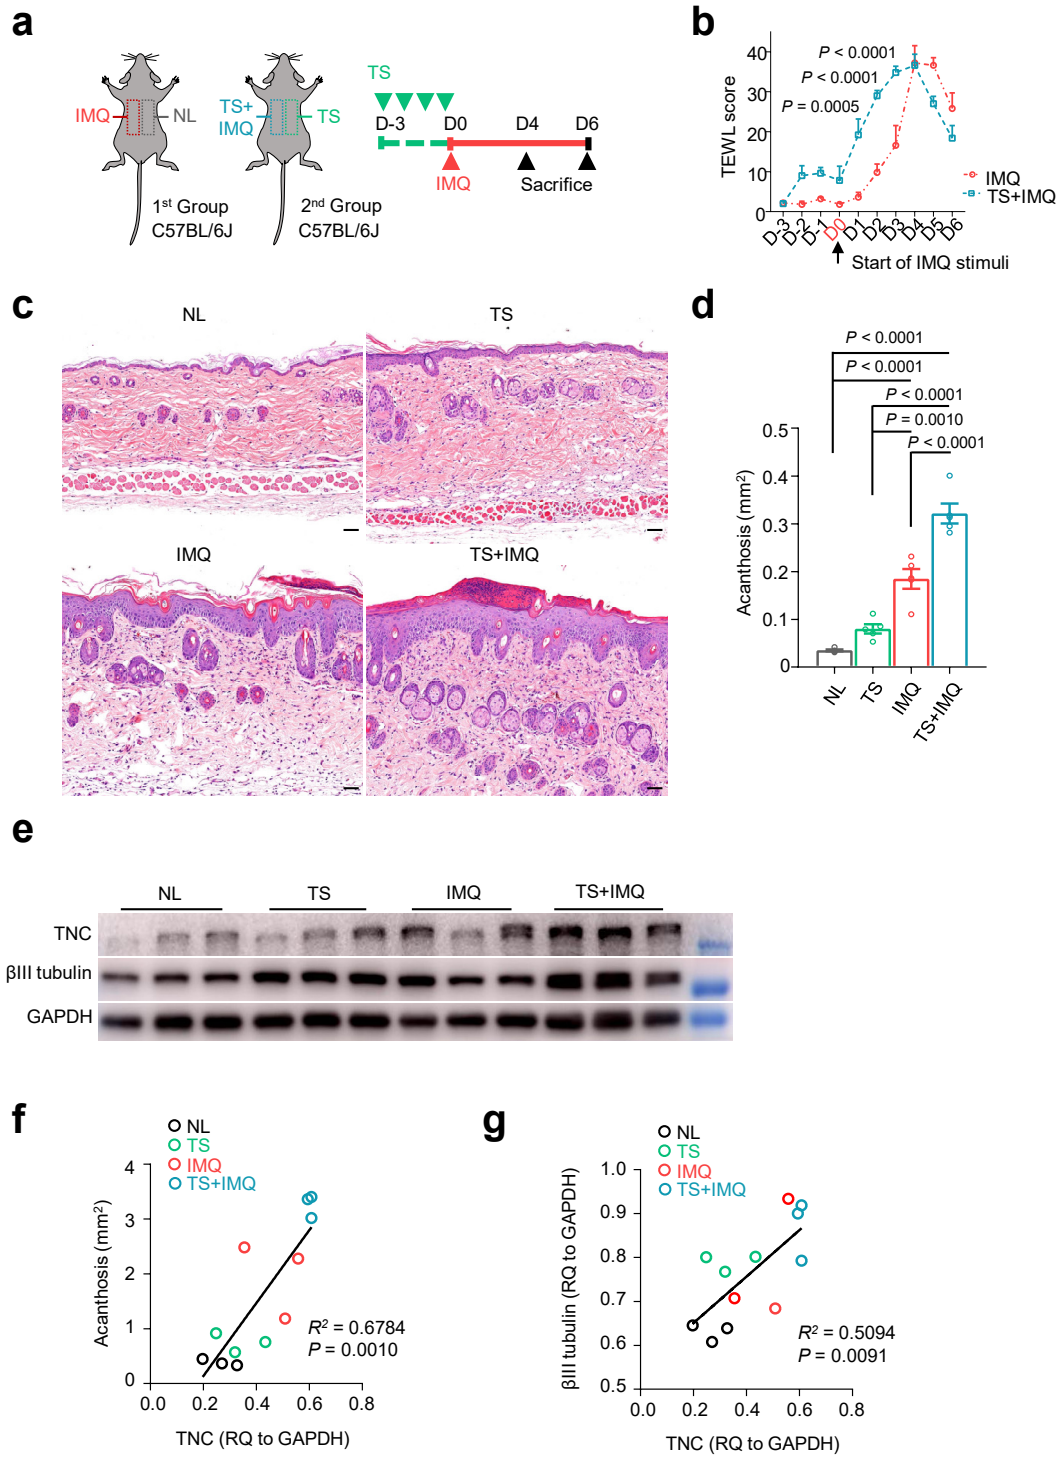

109 **Supplementary Fig. 5: TNC and  $\beta$ III tubulin expression are positively correlated**  
110 **upon injury and IMQ stimuli.**

111 **a**, Schematic diagram of tape stripping (TS) pre-treated IMQ mouse model. No pre-TS  
112 in the 1<sup>st</sup> group; pre-TS 5 times daily for consecutive 4 days in the 2<sup>nd</sup> group. All mice  
113 were administrated with IMQ on half-back skin from D0 and were sacrificed on  
114 indicated days. NL, with no TS or IMQ treatment; IMQ, with only IMQ treatment; TS,  
115 with only TS treatment; TS+IMQ, with both TS and IMQ treatment.

116 **b**, Trans-epidermal water loss (TEWL) scores of TS or IMQ+TS mouse skin (n = 5  
117 mice per group).

118 **c, d**, Representative H&E images (**c**) and quantification of acanthosis (**d**) of  
119 NL/TS/IMQ/TS+IMQ mouse skin on day 4 post IMQ administration (n= 5 mouse skin  
120 samples per group). Scale bar in (**c**), 50  $\mu$ m.

121 **e-g**, Immunoblotting (**e**) and correlation analysis of TNC expression and acanthosis (**f**)  
122 or TNC and  $\beta$ III tubulin expression (**g**) in NL/TS/IMQ/TS+IMQ mouse skin on day 4  
123 post-IMQ administration (n= 3 mouse skin samples per group).

124 All data are representatives of two independent experiments. Data are presented as  
125 mean  $\pm$  SEM in (**b, d**). The *P* values were calculated by two-way ANOVA and Holm-  
126 Šídák test (**b**), one-way ANOVA and Tukey's test (**d**), and Linear regression (**f, g**).

127 Source data are provided as a Source Data file.

128

# Supplementary Figure 6

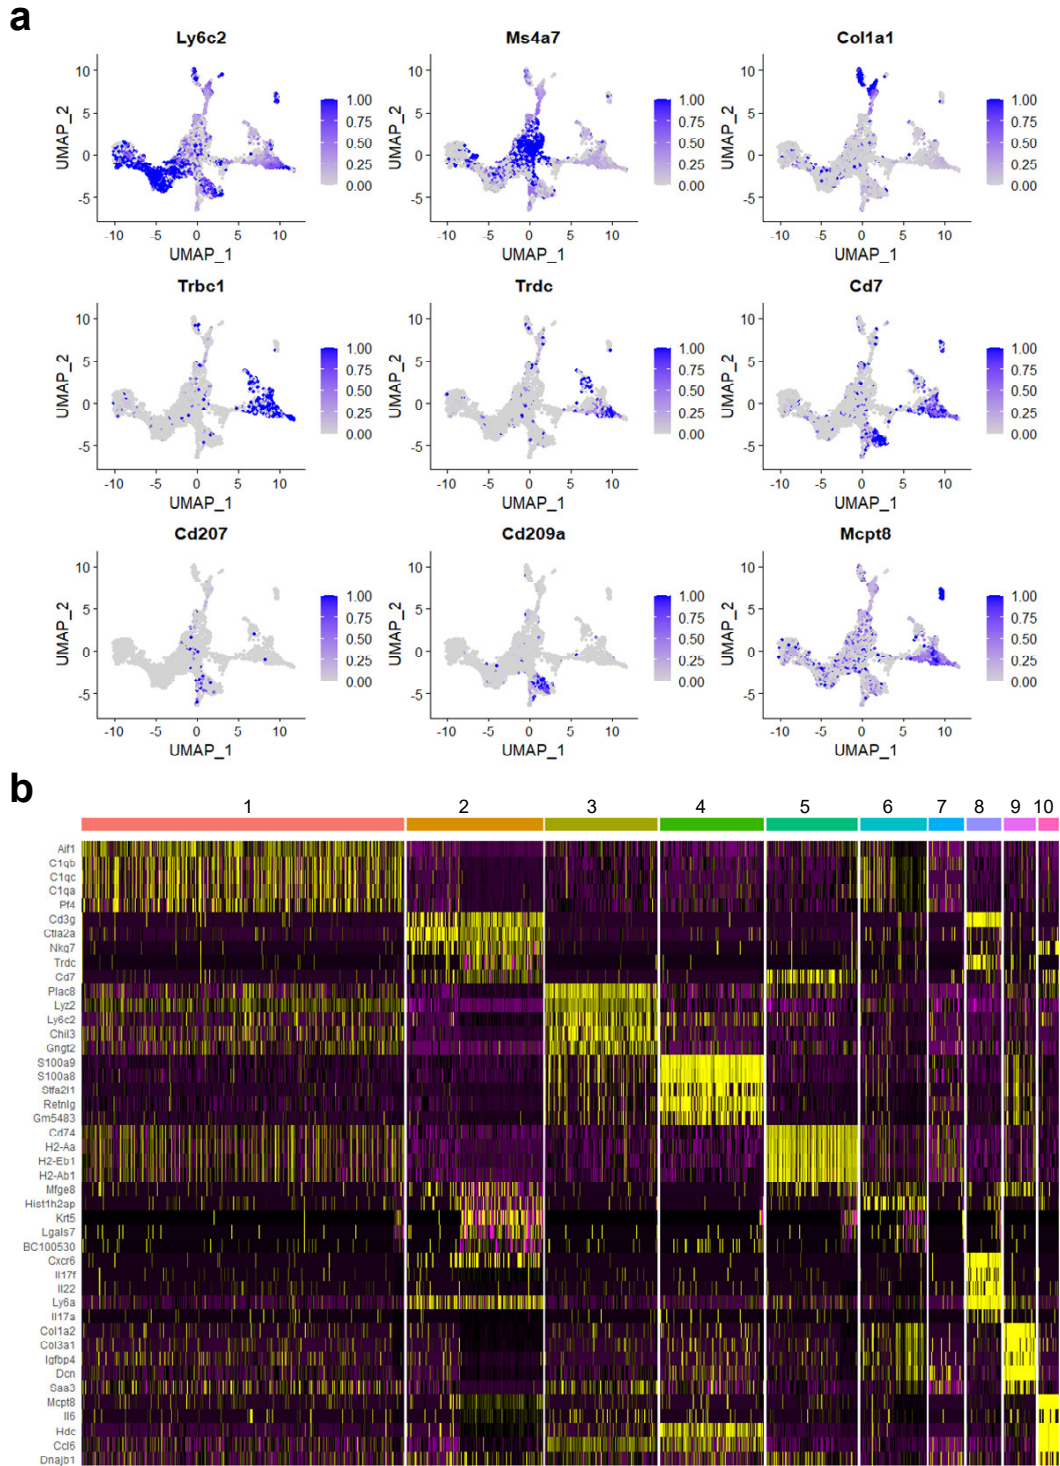

132 **Supplementary Fig. 6: ScRNA-seq analysis of immune cells in IMQ-induced**

133 **mouse skin.**

134 **a, b,** Feature plots (**a**) and heatmap (**b**) of signature genes among clusters.

135

# Supplementary Figure 7

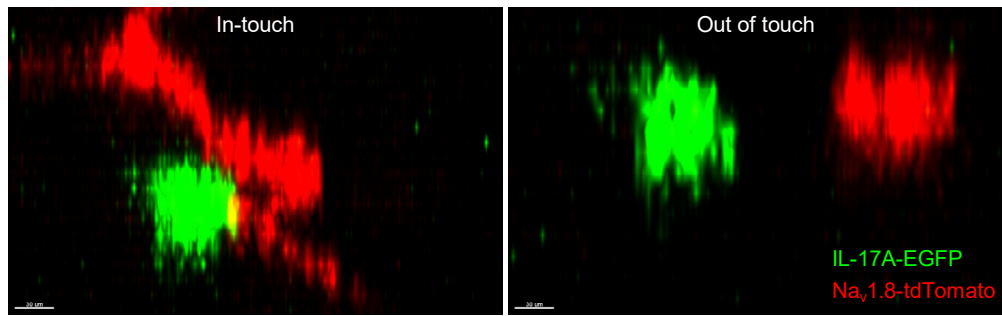

139 **Supplementary Fig. 7: Pathogenic T cells in contact with cutaneous nerves in**  
140 **mouse psoriasiform lesions.** Representative images of the IL-17A<sup>+</sup> T cells that are in  
141 contact (left) or not in contact (right) with cutaneous nerves (over 300 EGFP<sup>+</sup> T cells  
142 were observed during contact ratio quantification).

143

# Supplementary Figure 8

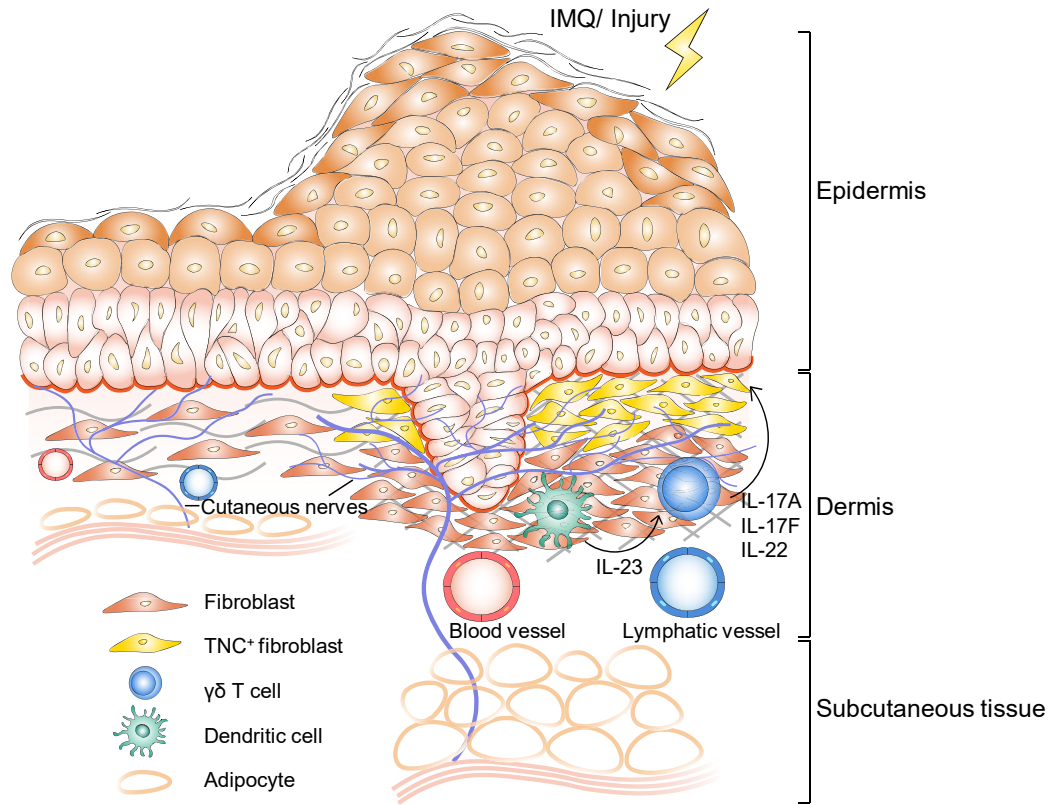



147 **Supplementary Fig. 8: Graphical summary.** A subset of TNC<sup>+</sup> fibroblasts emerged  
148 at the dermal-epidermal junction upon skin irritation and promoted inflammation  
149 through facilitating excessive axonogenesis and neuro-immune synapse formation.  
150

# Supplementary Figure 9

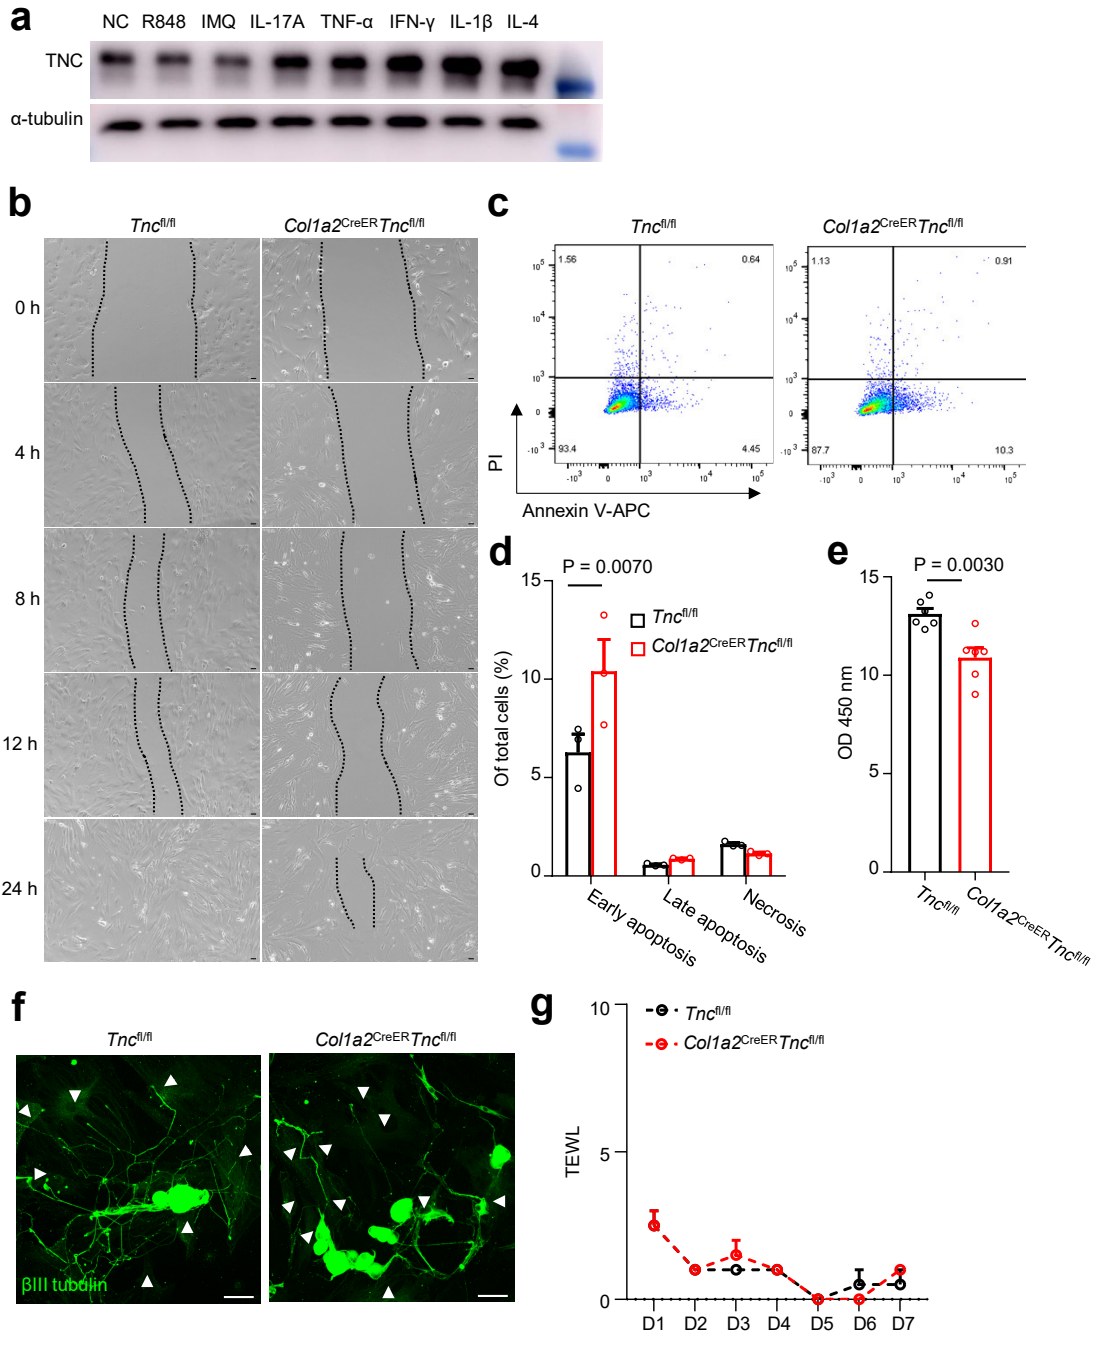

154 **Supplementary Fig. 9: The effect of TNC ablation on primary mouse dermal**

155 **fibroblasts.** (*Related to the point-by-point response letter to the reviewers*)

156 **a,** Immunoblot of TNC expression in primary mouse dermal fibroblasts treated with  
157 imiquimod (IMQ, 2 µg/mL), resiquimod (R848, 1 µg/mL), recombinant IL-17A and  
158 several other inflammatory cytokines (10 ng/mL).

159 **b,** Scratch assay images of primary dermal fibroblasts from *Tnc*<sup>fl/fl</sup> or *Colla2*<sup>CreER</sup>*Tnc*<sup>fl/fl</sup>  
160 mice (n = 3). Scale bar, 10000 µm.

161 **c, d,** Flow cytometric analysis (**c**) and quantification (**d**) of primary dermal fibroblasts  
162 apoptosis from *Tnc*<sup>fl/fl</sup> or *Colla2*<sup>CreER</sup>*Tnc*<sup>fl/fl</sup> mice (n = 3).

163 **e,** CCK8 quantification of primary dermal fibroblast proliferation from *Tnc*<sup>fl/fl</sup> or  
164 *Colla2*<sup>CreER</sup>*Tnc*<sup>fl/fl</sup> mice (n = 6).

165 **f,** Representative immunofluorescent images of dorsal root ganglion (DRG) neurons  
166 co-cultured with primary dermal fibroblasts from *Tnc*<sup>fl/fl</sup> or *Colla2*<sup>CreER</sup>*Tnc*<sup>fl/fl</sup> mice (n  
167 = 3). Surrounding fibroblasts were labeled by white arrowheads. Scale bar, 50 µm.

168 **g,** Trans-epidermal water loss (TEWL) scores of *Tnc*<sup>fl/fl</sup> or *Colla2*<sup>CreER</sup>*Tnc*<sup>fl/fl</sup> mouse  
169 shaved back skin (n = 3).

170 All data are representatives of two independent experiments. Data are presented as  
171 mean ± SEM in (**d, e, g**). The *P* values were calculated by two-way ANOVA and  
172 Holm-Šidák test (**d, g**) or two-tailed unpaired Student's *t*-test (**e**).

173 Source data are provided as a Source Data file.

174
